# Supplementary material for: Study of Molecular Dimer Morphology Based on Organic Spin Centers: Nitronyl Nitroxide Radicals
Source: MDPI journal article supplement (doi:10.3390/molecules29092042), 2024-04-28
Supplement: s1 [file s1]

Supplementary Material

## **Study of molecular dimer morphology based on organic spin centers: nitronyl nitroxide radicals**

Dongdong Wei <sup>1</sup>, Yongliang Qin <sup>2</sup>, Zhipeng Xu <sup>1</sup>, Hui Liu <sup>1</sup>, Ranran Chen <sup>1</sup>, Yang Yu <sup>3</sup> and Di Wang <sup>1\*</sup>

1 School of Materials Science and Chemical Engineering, Anhui Jianzhu University, Hefei 230601, China

2 Anhui Province Key Laboratory of Condensed Matter Physics at Extreme Conditions, Hefei Institutes of Physical Science, Chinese Academy of Sciences, Hefei 230031, China

3 School of Advanced Manufacturing Engineering, Hefei University, Hefei 230601, China

\* Correspondence: wangdi@ahjzu.edu.cn

## Contents

|                       |    |
|-----------------------|----|
| Materials and Methods | S1 |
| Synthesis             | S1 |
| NMR spectra           | S3 |
| HR-MS spectra         | S4 |
| TEM                   | S5 |
| EPR spectra           | S5 |
| SQUID spectra         | S6 |
| Geometry Coordinates  | S7 |

## Materials and Methods

Unless otherwise specified, light experiments were conducted using a WFH-204B portable UV detector. The UV-Vis absorption spectra were recorded at room temperature using a CELHXF 300 spectrophotometer. The spectral experiments were conducted at room temperature using toluene and dichloromethane as solvents. NMR spectra were recorded using a 400 MHz Bruker spectrometer with DMSO-d<sub>6</sub> as the solvent for proton magnetic resonance (<sup>1</sup>H NMR) spectra, and the data are reported in ppm relative to the internal standard Me<sub>4</sub>Si. High-resolution mass spectra were acquired in ESI mode on the Waters Xevo G2-S QToF instrument, unless otherwise specified. Unless otherwise stated, CW X-band EPR spectra were obtained in an oxygen-free toluene solution at 10<sup>-4</sup> M. The g-factor corrections were performed using 2,2-diphenyl-1-picrylhydrazyl (g = 2.0037) as a standard, equipped with a frequency counter and temperature control of the liquid helium stream, and simulated with WINEPR SimFonia. Variable temperature magnetization measurements were carried out using the Quantum Design MPMS-XL-7 SQUID Magnetization Meter over a temperature range of 2-300 K with an external magnetic field of 10,000 Oe. Samples were wrapped with approximately 10 mg of Teflon tape and measured in a measurement tube, excluding the background signal from the sample holder with antimagnetic correction. AFM testing was performed on the Bruker Dimension instrument, unless otherwise specified. TEM tests were conducted on the Jem-2100F instrument, unless otherwise specified.

## Synthesis

**(E)-4-((4-formylphenyl)diazenyl)benzoic acid (1):** An aqueous solution (2 mL) of sodium nitrite (0.828 g, 12 mmol) was added dropwise to a magnetically stirred solution of p-aminobenzoic acid (1.370 g, 10 mmol) in dilute hydrochloric acid (3.6 N, 25 mL) at 0 °C. The mixture was stirred at 0 °C for 30 min and the reaction system was added dropwise to a solution of benzaldehyde (1 mL, 10 mmol) after adjusting to pH = 7 with NaCO<sub>3</sub> solution at 0 °C. After complete addition, the mixture was reacted at 0 °C for 2 h and then heated to room temperature and stirred for 16 h. The mixture was washed with NaCO<sub>3</sub> solution and then acidified with dilute HCl solution. The brown solid was filtered, washed with water and dried. By silica gel column chromatography, (eluent: ethyl acetate/hexane (1:2)) (E)-4-((4-formylphenyl) diazenyl) benzoic acid (1.32 g, 52%) was obtained as a brown solid. <sup>1</sup>H NMR (400 MHz, DMSO) δ 13.14 (s, 1H), 10.47 (s, 1H), 8.12 (d, J = 8.7 Hz, 2H), 7.87 (dd, J = 13.4, 8.8 Hz, 4H), 6.97 (d, J = 8.9 Hz, 2H).

**4-((4-(1-oxyl-3-oxide-4,4,5,5-tetramethylimidazolin-2-yl)phenyl)diazinyl)benzoic acid(Azo-NN):** 1)Compound 1 (254 mg, 1 mmol) and 1.5 eq 2,3-Dimethyl-2,3-bis(hydroxylamino)butane (222 mg, 1.5 mmol) were charged into a flask, evacuated and kept under argon. Mixed solvent with MeOH (25 mL) was added into the flask from syringes and was kept argon bubbling for 20 mins. Then the system was heated to 70 °C and refluxed for 36 hours. The color of the reaction mixture turned brownish-red. Then the solvent was evaporated and the

white with a little brownish-red solid did not need further purification for synthesis in the next step.

2) Dissolve the product of the previous step in 25 ml of DCM and fill the flask, then place it in an ice-water bath. Take one equivalent of sodium periodate and dissolve it in 15 ml of deionized water. The sodium periodate solution was slowly added dropwise to the reaction system and the reaction was performed in an ice-water bath for about 40 min, and the reaction system changed from brownish red to purple to stop the reaction. Purification was performed using column chromatographic separations (eluent: ethyl acetate/ Dichloromethane (1:1)), and a purple solid was collected.

## NMR spectra

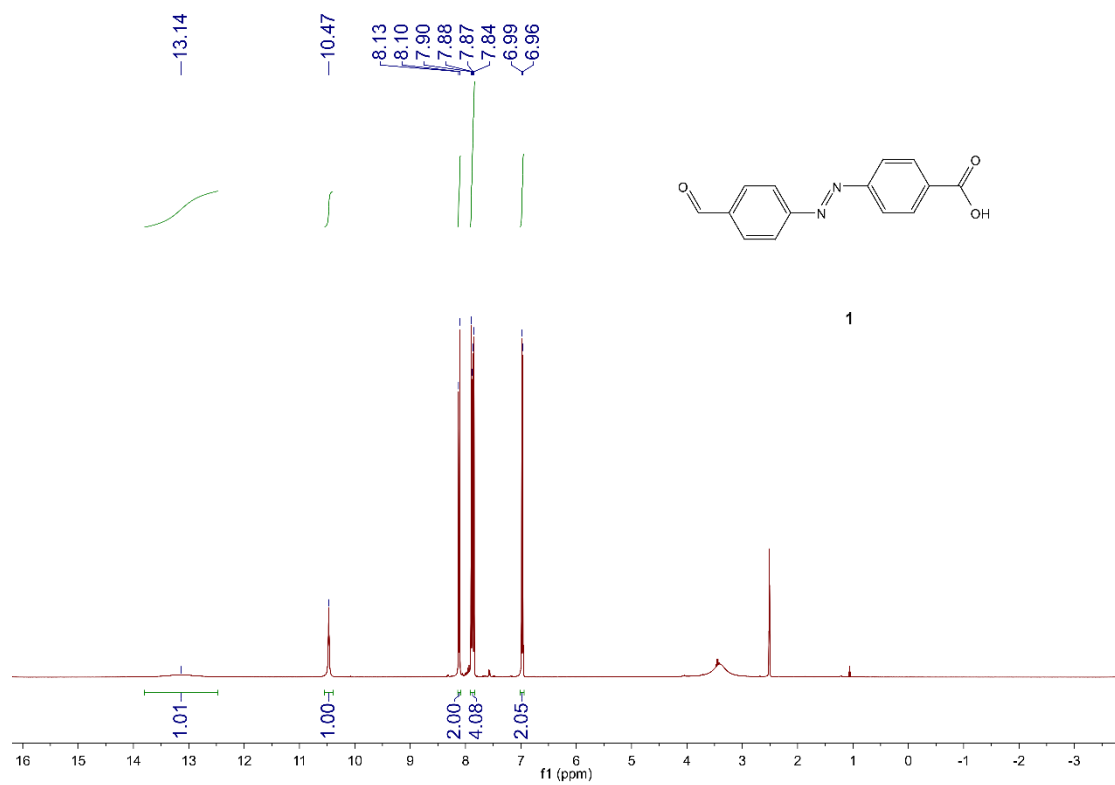

Figure S1. <sup>1</sup>H NMR spectrum of **1** (400 MHz, 298 K, DMSO-d<sub>6</sub>).

## HR-MS spectra

### Elemental Composition Report

Page 1

#### Single Mass Analysis

Tolerance = 20.0 PPM / DBE: min = -1.5, max = 50.0

Element prediction: Off

Number of isotope peaks used for i-FIT = 3

Monoisotopic Mass, Even Electron Ions

268 formula(e) evaluated with 1 results within limits (up to 50 closest results for each mass)

Elements Used:

C: 14-14 H: 11-11 N: 0-100 O: 0-100 Na: 0-1

4

230624-11-1 16 (0.187)

1: TOF MS ES+  
4.00e+001

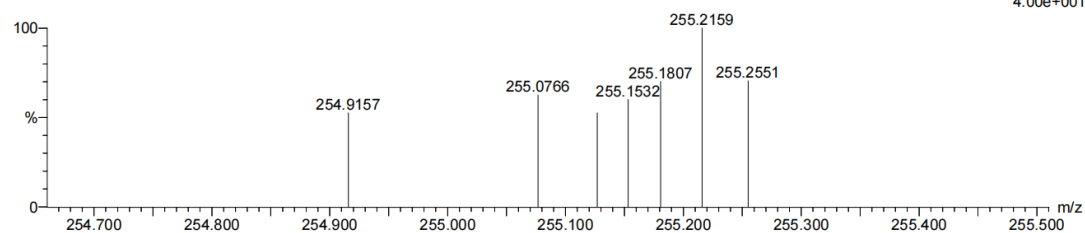

Minimum: -1.5  
Maximum: 5.0 20.0 50.0

| Mass     | Calc. Mass | mDa  | PPM  | DBE  | i-FIT | Norm | Conf(%) | Formula       |
|----------|------------|------|------|------|-------|------|---------|---------------|
| 255.0766 | 255.0770   | -0.4 | -1.6 | 10.5 | 45.4  | n/a  | n/a     | C14 H11 N2 O3 |

Figure S2. HR-MS spectrum of **1**

## TEM

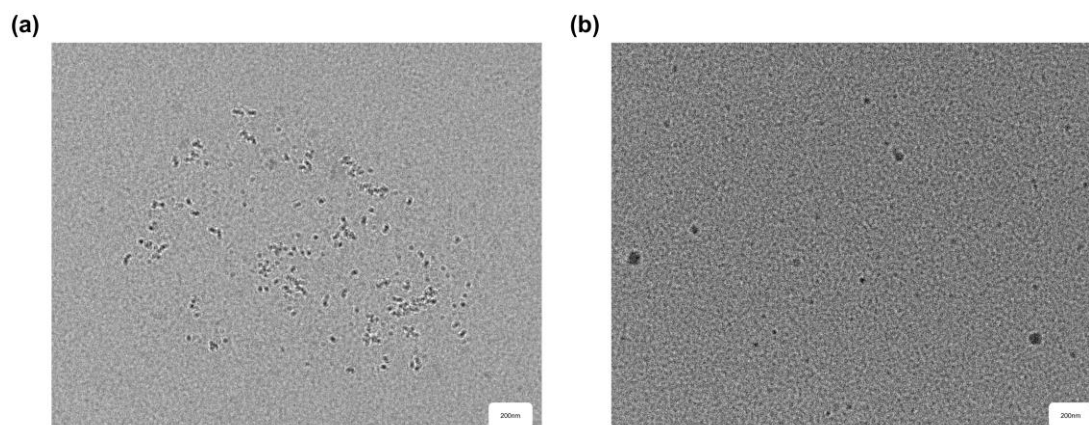

Figure S3. TEM image of **Azo-NN** after 365 nm UV illumination at  $10^{-4}$  M, (a) dissolved in dichloromethane; and (b) dissolved in toluene.

## EPR spectra

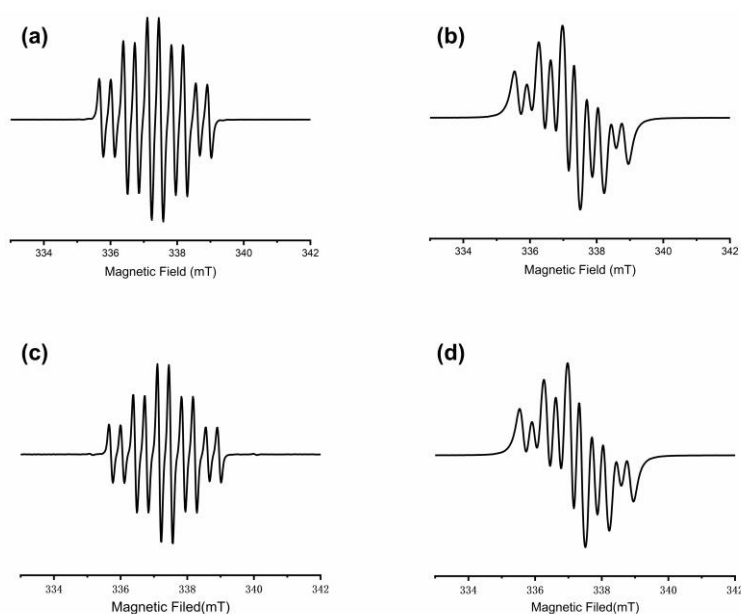

Figure S4. Electron paramagnetic resonance spectra measured at room temperature. (a) **Azo-NN** in degassed toluene at  $10^{-4}$  M; (b) **Azo-NN** in degassed DCM at  $10^{-4}$  M; (c) after 2.5 hours of UV illumination at 365nm wavelengths **Azo-NN** in degassed toluene at  $10^{-4}$  M; and (d) after 2.5 hours of UV illumination at 365nm wavelengths **Azo-NN** in degassed DCM at  $10^{-4}$  M.

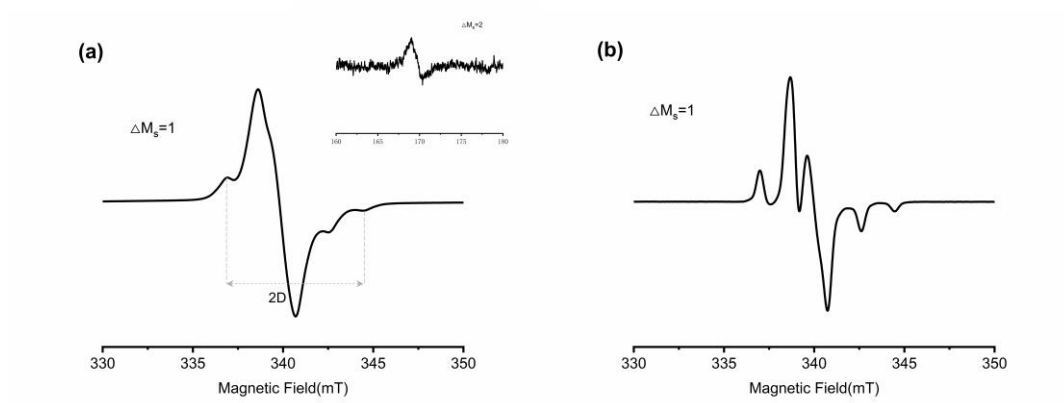

Figure S5. Electron paramagnetic resonance cryogenic freezing spectra at 100K. (a) **Azo-NN** in degassed DCM at  $10^{-4}$  M (inset: forbidden transition of  $\Delta M_s = 2$ ) and (b) Azo-NN in degassed toluene at  $10^{-4}$  M.

## SQUID spectra

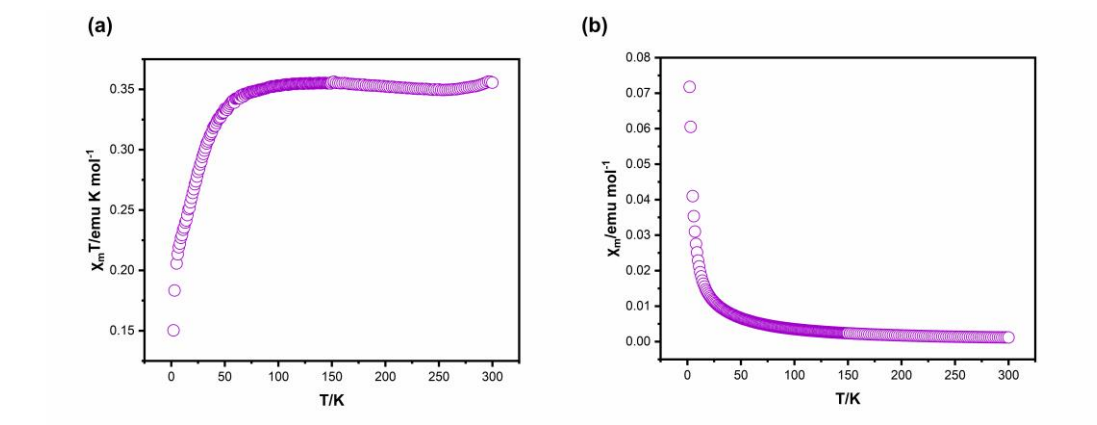

Figure S6. SQUID magnetometry of solid powder radicals. (a)  $\chi_m T$  vs  $T$  and (b)  $\chi_m$  vs  $T$ .



## Geometry Coordinates

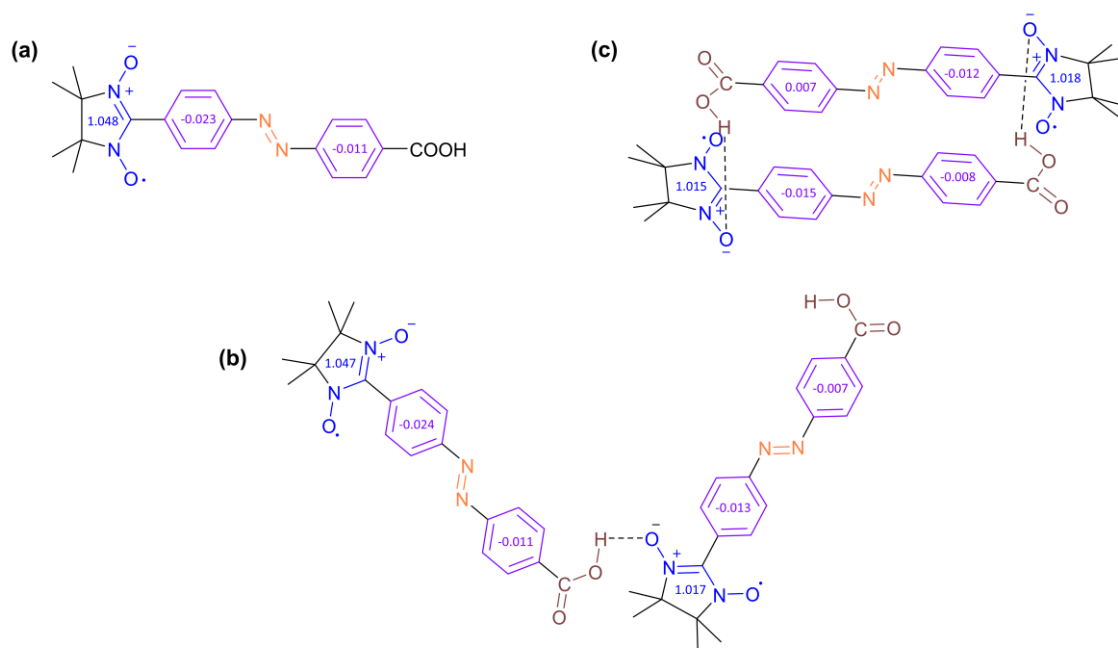

Figure S7. Spin population of (a) Azo-NN (doublet); (b) "L"-type dimer (triplet) and (c) ring-closed dimer (triplet).

### Azo-NN(doublet)

Mulliken charges and spin densities with hydrogens summed into heavy atoms:

|    |   | 1         | 2         |
|----|---|-----------|-----------|
| 1  | C | 0.112122  | 0.083696  |
| 2  | C | 0.046086  | -0.068719 |
| 3  | C | 0.033096  | 0.041810  |
| 4  | C | 0.169558  | -0.059335 |
| 5  | C | 0.080649  | 0.041132  |
| 6  | C | 0.037146  | -0.061591 |
| 7  | N | -0.290030 | 0.028862  |
| 8  | N | -0.292169 | -0.045379 |
| 9  | C | 0.165653  | 0.014553  |
| 10 | C | 0.653197  | -0.250068 |
| 11 | C | 0.051792  | -0.014296 |
| 12 | C | -0.031794 | 0.008588  |
| 13 | C | 0.042524  | -0.014693 |
| 14 | C | 0.028762  | 0.008383  |
| 15 | C | 0.105109  | -0.014025 |
| 16 | N | -0.337188 | 0.271157  |
| 17 | N | -0.337098 | 0.272346  |
| 18 | C | 0.135937  | -0.016653 |
| 19 | C | 0.134648  | -0.016800 |

|    |   |           |           |
|----|---|-----------|-----------|
| 20 | O | -0.369608 | 0.376839  |
| 21 | O | -0.369546 | 0.377829  |
| 22 | C | 0.089891  | 0.015754  |
| 23 | C | 0.079994  | 0.003143  |
| 24 | C | 0.089965  | 0.015902  |
| 25 | C | 0.079523  | 0.003122  |
| 26 | C | 0.453988  | 0.001663  |
| 27 | O | -0.386533 | -0.003092 |
| 28 | O | -0.175678 | -0.000128 |

#### Azo-NN(Ring-closed dimer singlet)

Mulliken charges and spin densities with hydrogens summed into heavy atoms:

|    |   | 1         | 2         |
|----|---|-----------|-----------|
| 1  | C | 0.119722  | 0.062553  |
| 2  | C | 0.051704  | -0.046083 |
| 3  | C | 0.036531  | 0.028983  |
| 4  | C | 0.164509  | -0.042572 |
| 5  | C | 0.083674  | 0.028116  |
| 6  | C | 0.046823  | -0.042905 |
| 7  | N | -0.278119 | 0.017635  |
| 8  | N | -0.284564 | -0.025199 |
| 9  | C | 0.159961  | 0.008169  |
| 10 | C | 0.619389  | -0.224616 |
| 11 | C | 0.089610  | -0.008390 |
| 12 | C | 0.006328  | 0.005117  |
| 13 | C | 0.034107  | -0.008784 |
| 14 | C | 0.034358  | 0.005055  |
| 15 | C | 0.054345  | -0.008223 |
| 16 | C | 0.448844  | 0.001786  |
| 17 | N | -0.318818 | 0.265048  |
| 18 | N | -0.308790 | 0.294823  |
| 19 | C | 0.133563  | -0.016243 |
| 20 | C | 0.130683  | -0.016913 |
| 21 | O | -0.348625 | 0.427176  |
| 22 | O | -0.447652 | 0.255411  |
| 23 | C | 0.089100  | 0.003254  |
| 24 | C | 0.096162  | 0.016032  |
| 25 | C | 0.090937  | 0.003455  |
| 26 | C | 0.101404  | 0.016079  |
| 27 | O | -0.407403 | -0.002848 |
| 28 | O | -0.185057 | -0.010886 |
| 30 | C | 0.111380  | -0.064827 |
| 31 | C | 0.053746  | 0.050529  |
| 32 | C | 0.034176  | -0.031424 |

|    |   |           |           |
|----|---|-----------|-----------|
| 33 | C | 0.170887  | 0.045886  |
| 34 | C | 0.082734  | -0.030728 |
| 35 | C | 0.041724  | 0.045166  |
| 36 | N | -0.284822 | -0.021361 |
| 37 | N | -0.291967 | 0.029536  |
| 38 | C | 0.160369  | -0.009551 |
| 39 | C | 0.642050  | 0.214694  |
| 40 | C | 0.097035  | 0.009415  |
| 41 | C | 0.019792  | -0.005803 |
| 42 | C | 0.029539  | 0.010325  |
| 43 | C | 0.018523  | -0.005390 |
| 44 | C | 0.039191  | 0.010002  |
| 45 | C | 0.453909  | -0.001659 |
| 46 | N | -0.324543 | -0.269955 |
| 47 | N | -0.341722 | -0.295403 |
| 48 | C | 0.135880  | 0.016210  |
| 49 | C | 0.144037  | 0.016539  |
| 50 | O | -0.343058 | -0.438087 |
| 51 | O | -0.437844 | -0.226581 |
| 52 | C | 0.108730  | -0.016867 |
| 53 | C | 0.080973  | -0.002306 |
| 54 | C | 0.090969  | -0.016794 |
| 55 | C | 0.086699  | -0.002296 |
| 56 | O | -0.407084 | 0.003087  |
| 57 | O | -0.184028 | 0.002615  |

**Azo-NN(Ring-closed dimer triplet)**

Mulliken charges and spin densities with hydrogens summed into heavy atoms:

|    |   | 1         | 2         |
|----|---|-----------|-----------|
| 1  | C | 0.119741  | 0.062564  |
| 2  | C | 0.051700  | -0.046107 |
| 3  | C | 0.036526  | 0.028985  |
| 4  | C | 0.164497  | -0.042584 |
| 5  | C | 0.083698  | 0.028129  |
| 6  | C | 0.046774  | -0.042899 |
| 7  | N | -0.278133 | 0.017621  |
| 8  | N | -0.284589 | -0.025188 |
| 9  | C | 0.159971  | 0.008094  |
| 10 | C | 0.619437  | -0.224629 |
| 11 | C | 0.089638  | -0.008250 |
| 12 | C | 0.006328  | 0.004696  |
| 13 | C | 0.034136  | -0.008528 |
| 14 | C | 0.034380  | 0.004887  |
| 15 | C | 0.054345  | -0.008005 |
| 16 | C | 0.448798  | 0.000122  |

|    |   |           |           |
|----|---|-----------|-----------|
| 17 | N | -0.318842 | 0.265022  |
| 18 | N | -0.308836 | 0.294881  |
| 19 | C | 0.133577  | -0.016236 |
| 20 | C | 0.130687  | -0.016913 |
| 21 | O | -0.348632 | 0.427124  |
| 22 | O | -0.447619 | 0.255472  |
| 23 | C | 0.089096  | 0.003250  |
| 24 | C | 0.096154  | 0.016030  |
| 25 | C | 0.090931  | 0.003453  |
| 26 | C | 0.101391  | 0.016086  |
| 27 | O | -0.407387 | -0.000409 |
| 28 | O | -0.185084 | 0.010694  |
| 30 | C | 0.111378  | 0.064810  |
| 31 | C | 0.053743  | -0.050524 |
| 32 | C | 0.034169  | 0.031404  |
| 33 | C | 0.170883  | -0.045872 |
| 34 | C | 0.082731  | 0.030710  |
| 35 | C | 0.041736  | -0.045159 |
| 36 | N | -0.284812 | 0.021278  |
| 37 | N | -0.291927 | -0.029478 |
| 38 | C | 0.160352  | 0.009404  |
| 39 | C | 0.642079  | -0.214691 |
| 40 | C | 0.097034  | -0.009239 |
| 41 | C | 0.019814  | 0.005677  |
| 42 | C | 0.029558  | -0.010250 |
| 43 | C | 0.018493  | 0.006507  |
| 44 | C | 0.039229  | -0.009855 |
| 45 | C | 0.453878  | 0.000753  |
| 46 | N | -0.324568 | 0.269984  |
| 47 | N | -0.341743 | 0.295339  |
| 48 | C | 0.135875  | -0.016216 |
| 49 | C | 0.144044  | -0.016533 |
| 50 | O | -0.343054 | 0.438105  |
| 51 | O | -0.437823 | 0.226610  |
| 52 | C | 0.108734  | 0.016868  |
| 53 | C | 0.080970  | 0.002309  |
| 54 | C | 0.090974  | 0.016791  |
| 55 | C | 0.086677  | 0.002299  |
| 56 | O | -0.407085 | -0.000850 |
| 57 | O | -0.184027 | 0.002457  |

**Azo-NN("L"-type dimer singlet)**

Mulliken charges and spin densities with hydrogens summed into heavy atoms:

|     | 1        | 2         |
|-----|----------|-----------|
| 1 C | 0.111165 | -0.082487 |

|    |   |           |           |
|----|---|-----------|-----------|
| 2  | C | 0.043295  | 0.067868  |
| 3  | C | 0.028186  | -0.041556 |
| 4  | C | 0.170985  | 0.059729  |
| 5  | C | 0.079179  | -0.040967 |
| 6  | C | 0.035021  | 0.061334  |
| 7  | N | -0.292188 | -0.029311 |
| 8  | N | -0.291917 | 0.043265  |
| 9  | C | 0.166296  | -0.014032 |
| 10 | C | 0.653133  | 0.249146  |
| 11 | C | 0.038329  | 0.013942  |
| 12 | C | 0.040854  | -0.008415 |
| 13 | C | 0.068280  | 0.014755  |
| 14 | C | 0.010425  | -0.008150 |
| 15 | C | 0.090162  | 0.013649  |
| 16 | C | 0.438063  | -0.001294 |
| 17 | N | -0.337384 | -0.272184 |
| 18 | N | -0.338388 | -0.271955 |
| 19 | C | 0.135344  | 0.016759  |
| 20 | C | 0.135833  | 0.016752  |
| 21 | O | -0.371708 | -0.374808 |
| 22 | O | -0.370768 | -0.376633 |
| 23 | C | 0.088090  | -0.015760 |
| 24 | C | 0.077807  | -0.003205 |
| 25 | C | 0.088570  | -0.015717 |
| 26 | C | 0.078004  | -0.003237 |
| 27 | O | -0.463200 | 0.002059  |
| 28 | O | -0.163589 | 0.010418  |
| 30 | C | 0.117207  | 0.066149  |
| 31 | C | 0.048195  | -0.050233 |
| 32 | C | 0.036580  | 0.031555  |
| 33 | C | 0.171467  | -0.045512 |
| 34 | C | 0.083914  | 0.031311  |
| 35 | C | 0.046139  | -0.046617 |
| 36 | N | -0.288660 | 0.022135  |
| 37 | N | -0.289947 | -0.032033 |
| 38 | C | 0.168278  | 0.010434  |
| 39 | C | 0.667436  | -0.214820 |
| 40 | C | 0.043216  | -0.010278 |
| 41 | C | 0.044244  | 0.006179  |
| 42 | C | 0.067424  | -0.010472 |
| 43 | C | 0.023533  | 0.006032  |
| 44 | C | 0.096570  | -0.010019 |
| 45 | C | 0.418108  | 0.001083  |
| 46 | N | -0.333705 | 0.277055  |

|    |   |           |           |
|----|---|-----------|-----------|
| 47 | N | -0.327481 | 0.295242  |
| 48 | C | 0.135938  | -0.017386 |
| 49 | C | 0.141632  | -0.016668 |
| 50 | O | -0.345230 | 0.436941  |
| 51 | O | -0.440866 | 0.222052  |
| 52 | C | 0.077206  | 0.003545  |
| 53 | C | 0.103036  | 0.017153  |
| 54 | C | 0.088972  | 0.015797  |
| 55 | C | 0.084010  | 0.003853  |
| 56 | O | -0.409026 | -0.002270 |
| 57 | O | -0.176071 | -0.000175 |

**Azo-NN("L"-type dimer triplet)**

Mulliken charges and spin densities with hydrogens summed into heavy atoms:

|    |   | 1         | 2         |
|----|---|-----------|-----------|
| 1  | C | 0.111258  | 0.082621  |
| 2  | C | 0.042935  | -0.068183 |
| 3  | C | 0.028208  | 0.041667  |
| 4  | C | 0.170625  | -0.059887 |
| 5  | C | 0.079334  | 0.041084  |
| 6  | C | 0.034791  | -0.061565 |
| 7  | N | -0.291811 | 0.029346  |
| 8  | N | -0.292427 | -0.043292 |
| 9  | C | 0.166676  | 0.013984  |
| 10 | C | 0.653130  | -0.249395 |
| 11 | C | 0.038398  | -0.013930 |
| 12 | C | 0.041380  | 0.008409  |
| 13 | C | 0.067594  | -0.014027 |
| 14 | C | 0.010468  | 0.008238  |
| 15 | C | 0.090119  | -0.013568 |
| 16 | C | 0.438176  | 0.001310  |
| 17 | N | -0.337825 | 0.271751  |
| 18 | N | -0.337878 | 0.272431  |
| 19 | C | 0.136183  | -0.016662 |
| 20 | C | 0.135469  | -0.016806 |
| 21 | O | -0.371886 | 0.374908  |
| 22 | O | -0.370564 | 0.377190  |
| 23 | C | 0.088222  | 0.015747  |
| 24 | C | 0.077738  | 0.003106  |
| 25 | C | 0.088517  | 0.015843  |
| 26 | C | 0.077652  | 0.003084  |
| 27 | O | -0.461651 | -0.003058 |
| 28 | O | -0.164843 | 0.009117  |
| 30 | C | 0.116930  | 0.066421  |
| 31 | C | 0.047511  | -0.050304 |

|    |   |           |           |
|----|---|-----------|-----------|
| 32 | C | 0.037170  | 0.031662  |
| 33 | C | 0.171556  | -0.045739 |
| 34 | C | 0.084319  | 0.031445  |
| 35 | C | 0.045945  | -0.046761 |
| 36 | N | -0.288768 | 0.022240  |
| 37 | N | -0.289746 | -0.032174 |
| 38 | C | 0.168142  | 0.010476  |
| 39 | C | 0.663803  | -0.215461 |
| 40 | C | 0.043309  | -0.010323 |
| 41 | C | 0.044224  | 0.006206  |
| 42 | C | 0.067394  | -0.010516 |
| 43 | C | 0.023592  | 0.006057  |
| 44 | C | 0.096655  | -0.010061 |
| 45 | C | 0.418182  | 0.001089  |
| 46 | N | -0.332882 | 0.277013  |
| 47 | N | -0.327591 | 0.295007  |
| 48 | C | 0.135326  | -0.017252 |
| 49 | C | 0.141988  | -0.016527 |
| 50 | O | -0.345323 | 0.436500  |
| 51 | O | -0.439073 | 0.223991  |
| 52 | C | 0.076964  | 0.003365  |
| 53 | C | 0.102946  | 0.017177  |
| 54 | C | 0.088684  | 0.015719  |
| 55 | C | 0.085818  | 0.003742  |
| 56 | O | -0.408987 | -0.002279 |
| 57 | O | -0.176077 | -0.000176 |
